# Supplementary material
Source: publisher figshare collection journal article supplement (https://acs.figshare.com/ndownloader/files/4317502)
Supplement: Supplementary file 1 [file 4317502]

## Redox-Responsive Gels with Tunable Hydrophobicity for Controlled Solubilization and Release of Organics

*Abhinav Akhouri, Lev Bromberg, and T. Alan Hatton\**

Department of Chemical Engineering, Massachusetts Institute of Technology,  
Cambridge Massachusetts 02139

### Confirmation of the ability of FeCl<sub>3</sub> to oxidize ferrocene

Solutions of both ferrocene and FeCl<sub>3</sub> in BuOH are yellow in color, as is evident from their UV-vis absorption spectra (Figure S1). Ferrocene shows an absorption peak at 227nm and 280nm corresponding to the  $\pi \rightarrow \pi^*$  transition of the cyclopentadiene ring.<sup>1</sup> Ferrocene also gives a broad, relatively weaker peak at 450nm which is a result of the symmetry forbidden transitions of electrons from non-bonding  $a_{1g}$  to the antibonding  $e_{1g}^*$  level of the iron 3d-orbital.<sup>2</sup> FeCl<sub>3</sub> gives a very broad peak with an extended shoulder from 280nm to 450nm, consistent with literature reports.<sup>1</sup> It is important to note that neither ferrocene nor FeCl<sub>3</sub> solutions absorb light of wavelength 642nm.

The color of the ferrocene solution was observed to change upon the sequential addition of drops of FeCl<sub>3</sub> solution from yellow to green to blue, as manifested by the changes in the absorption spectrum (Figure S2). A new peak was observed at 642nm, the height of which increased with increasing amounts of FeCl<sub>3</sub> solution added. The peak at 642nm characterizes the symmetry-allowed  $^2E_{2g} \rightarrow ^2E_{1u}$  transition of the ferrocenium cations confirming the successful oxidation of the ferrocene by FeCl<sub>3</sub>.

The confirmation of the ability of  $\text{FeCl}_3$  to oxidize ferrocene dissolved in butanol was followed by experiments to ascertain if  $\text{FeCl}_3$  could oxidize ferrocene moieties attached to polymeric gels. The chemical oxidation of ferrocene covalently attached to polymer backbone using chemical oxidizing agent  $\text{Ce}(\text{SO}_4)_2$  has been shown by Kuramoto et al.<sup>3</sup> When gels synthesized in this work containing ferrocene in the reduced state were allowed to equilibrate with a solvent containing dissolved  $\text{FeCl}_3$  the color of the gel was observed to change from orange to blue. The final blue color of the gel was similar to the blue color of ferrocene solution in butanol after oxidation by  $\text{FeCl}_3$ . The change in the color of the gel was used as evidence to conclude that ferrocene groups inside the gel had been oxidized. The color change results are shown in Figure S3 which compares the color of a gel piece in a reduced state and a gel piece after oxidation in a butanol solution containing  $\text{FeCl}_3$ . Moreover, the color change took place throughout the bulk gel confirming the ability of  $\text{FeCl}_3$  to diffuse inside the gel and react with ferrocene moieties throughout the gel.

The diffusion and the subsequent reaction of the ferric ions of  $\text{FeCl}_3$  with the ferrocene groups was also evident in the observed decrease in concentration of  $\text{FeCl}_3$  in the original solution as measured using UV-visible spectrophotometry. The results are shown in Figure S4 where the UV-visible absorbance peaks in the solution attributable to  $\text{FeCl}_3$  at 280nm and 335nm show a decrease in height after reaction with the ferrocene containing gels.

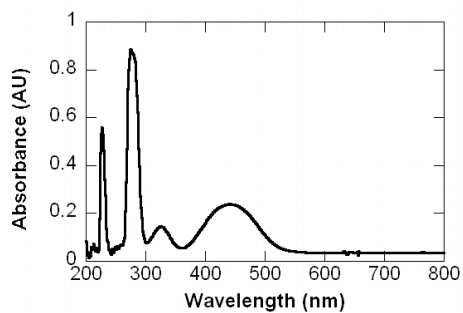

(a)

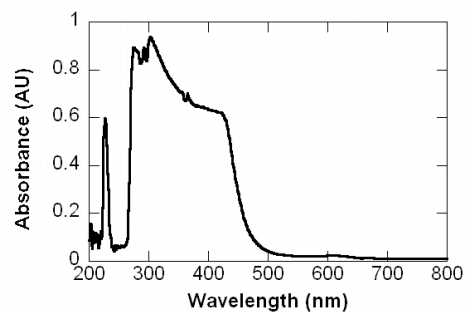

(b)

**Figure S1** UV-vis absorption spectra of solution of (a) ferrocene, and (b)  $\text{FeCl}_3$  in butanol

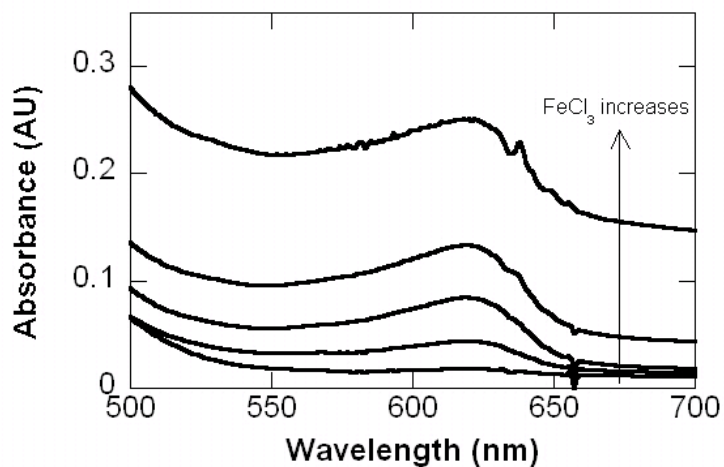

**Figure S2** Series of UV-vis absorption spectra of ferrocene solution in butanol obtained after drop-wise addition of  $\text{FeCl}_3$  to the solution

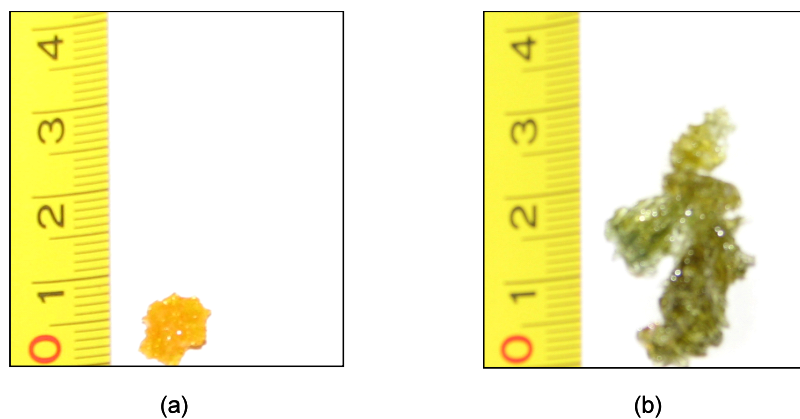

**Figure S3** Image of a gel piece (a) in reduced state, (b) in swollen state after oxidation by FeCl<sub>3</sub> dissolved in butanol

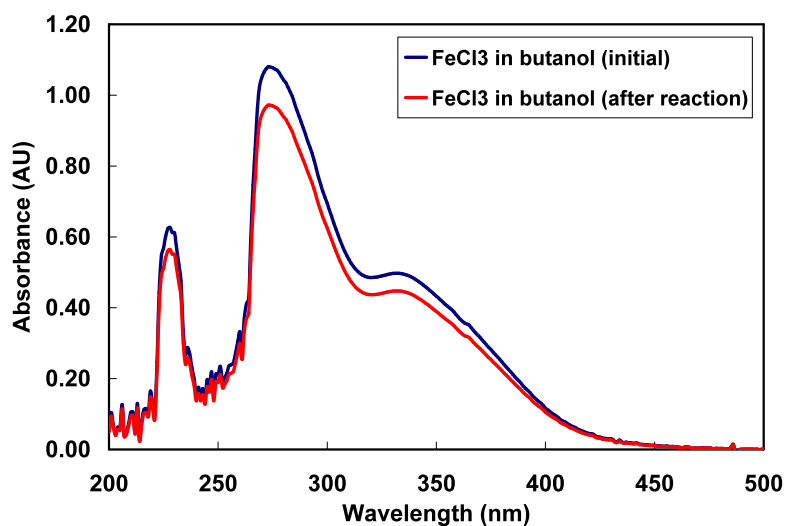

**Figure S4** UV-visible spectrum of FeCl<sub>3</sub> containing butanol before (in blue) and after (in red) reaction with ferrocene containing methacrylate gel

## References

- (1) Nguyen, M. T.; Diaz, A. F.; Dement'ev, V. V.; Pannell, K. H., High Molecular Weight Poly(ferrocenediyl-silanes): Synthesis and Electrochemistry of  $[-(\text{C}_5\text{H}_4)\text{Fe}(\text{C}_5\text{H}_4)\text{SiR}_2-]_n$ , R=Me, Et, n-Bu, n-Hex. *Chem. Mater.* **1993**, 5, 1389-1394.

- (2) Lentzner, H. L.; Watts, W. E., Bridged Ferrocenes. 7. Preparation and Properties of [2]Ferrocenophanes. *Tetrahedron* **1971**, 27, (18), 4343.
- (3) Kuramoto, N.; Shishido, Y.; Nagai, K., Thermosensitive and Redox-Active Polymers: Preparation and Properties of Poly (N-ethylacrylamide-co-vinylferrocene) and Poly(N,N-diethylacrylamide-co-vinylferrocene). *J. Polym. Sci., Part A: Polym. Chem.* **1997**, 35, (10), 1967-1972.
